# Supplementary material
Source: Springer Nature journal article supplement (https://www.springermedizin.de/resource/supplementary/12931_2010_1050_MOESM2_ESM.pdf/9425528)

**A**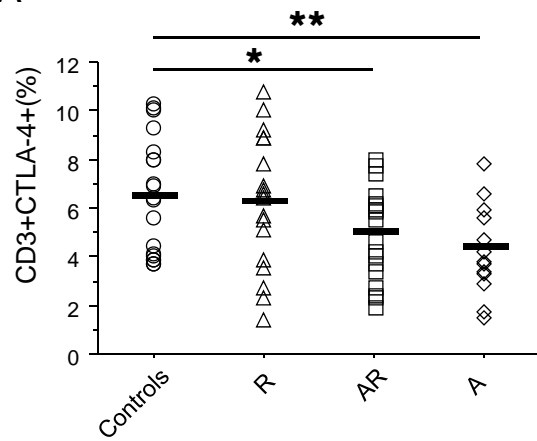**B**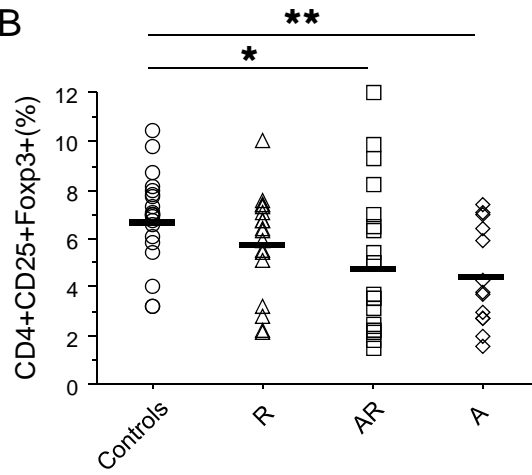**C**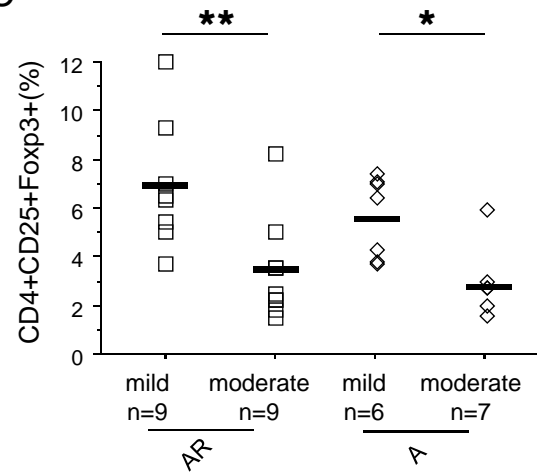**D**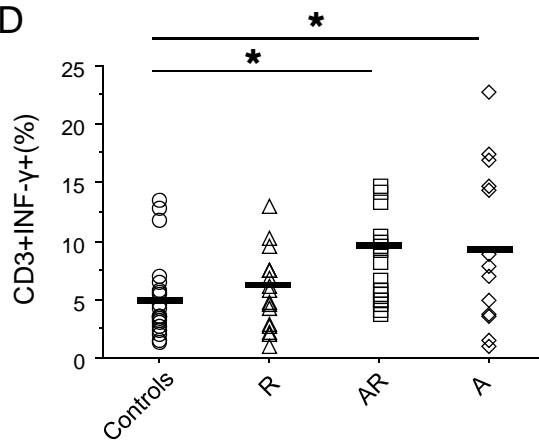**E**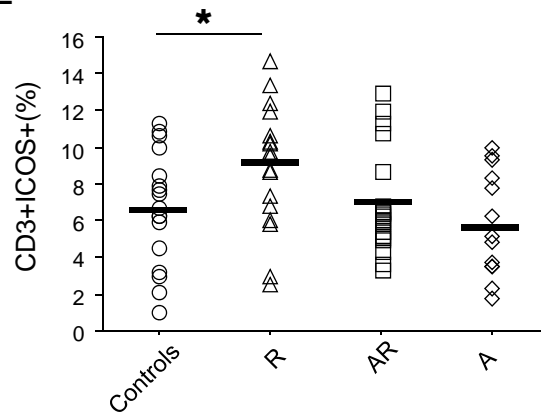

Supplement: MOESM2 [file 9425528]
